# Supplementary material
Source: PubMed Central journal article supplement (PMC4817559)
Supplement: Supp_Table1.pdf [file Supp_Table1.pdf]

## Supplementary Data

SUPPLEMENTARY TABLE S1. ASSOCIATIONS OF EXPOSURE TO INDIVIDUAL ARV MEDICATIONS  
AT ANY TIME DURING PREGNANCY WITH NEUROLOGIC OUTCOMES

| <i>Individual ARV medication</i>                               | <i>Overall<sup>a</sup> N (%)</i> | <i>Ever had microcephaly</i> |                           |                      | <i>Ever had any neurologic conditions</i> |                           |                      |
|----------------------------------------------------------------|----------------------------------|------------------------------|---------------------------|----------------------|-------------------------------------------|---------------------------|----------------------|
|                                                                |                                  | <i>Yes (%)<sup>b</sup></i>   | <i>No (%)<sup>b</sup></i> | <i>p<sup>c</sup></i> | <i>Yes (%)<sup>b</sup></i>                | <i>No (%)<sup>b</sup></i> | <i>p<sup>c</sup></i> |
| <b>Nucleoside reverse transcriptase inhibitors (NRTIs)</b>     |                                  |                              |                           |                      |                                           |                           |                      |
| Abacavir                                                       |                                  |                              |                           |                      |                                           |                           |                      |
| Yes                                                            | 35 (2.5)                         | 2 (5.7)                      | 33 (94.3)                 | 1.00                 | 2 (5.7)                                   | 33 (94.3)                 | 0.77                 |
| No                                                             | 1,365 (97.5)                     | 103 (7.5)                    | 1,262 (92.5)              |                      | 132 (9.7)                                 | 1,233 (90.3)              |                      |
| Didanosine                                                     |                                  |                              |                           |                      |                                           |                           |                      |
| Yes                                                            | 73 (5.2)                         | 5 (6.8)                      | 68 (93.2)                 | 1.00                 | 5 (6.8)                                   | 68 (93.2)                 | 0.54                 |
| No                                                             | 1,327 (94.8)                     | 100 (7.5)                    | 1,227 (92.5)              |                      | 129 (9.7)                                 | 1,198 (90.3)              |                      |
| Emtricitabine                                                  |                                  |                              |                           |                      |                                           |                           |                      |
| Yes                                                            | 4 (0.3)                          | 0 (0.0)                      | 4 (100.0)                 | 1.00                 | 0 (0.0)                                   | 4 (100.0)                 | 1.00                 |
| No                                                             | 1,396 (99.7)                     | 105 (7.5)                    | 1,291 (92.5)              |                      | 134 (9.6)                                 | 1,262 (90.4)              |                      |
| Lamivudine                                                     |                                  |                              |                           |                      |                                           |                           |                      |
| Yes                                                            | 1,374 (98.1)                     | 102 (7.4)                    | 1,272 (92.6)              | 0.44                 | 131 (9.5)                                 | 1,243 (90.5)              | 0.73                 |
| No                                                             | 26 (1.9)                         | 3 (11.5)                     | 23 (88.5)                 |                      | 3 (11.5)                                  | 23 (88.5)                 |                      |
| Stavudine                                                      |                                  |                              |                           |                      |                                           |                           |                      |
| Yes                                                            | 116 (8.3)                        | 7 (6.0)                      | 109 (94.0)                | 0.71                 | 7 (6.0)                                   | 109 (94.0)                | 0.25                 |
| No                                                             | 1,284 (91.7)                     | 98 (7.6)                     | 1,186 (92.4)              |                      | 127 (9.9)                                 | 1,157 (90.1)              |                      |
| Tenofovir                                                      |                                  |                              |                           |                      |                                           |                           |                      |
| Yes                                                            | 42 (3.0)                         | 1 (2.4)                      | 41 (97.6)                 | 0.36                 | 3 (7.1)                                   | 39 (92.9)                 | 0.79                 |
| No                                                             | 1,358 (97.0)                     | 104 (7.7)                    | 1,254 (92.3)              |                      | 131 (9.6)                                 | 1,227 (90.4)              |                      |
| Zalcitabine                                                    |                                  |                              |                           |                      |                                           |                           |                      |
| Yes                                                            | 2 (0.1)                          | 1 (50.0)                     | 1 (50.0)                  | 0.14                 | 1 (50.0)                                  | 1 (50.0)                  | 0.18                 |
| No                                                             | 1,398 (99.9)                     | 104 (7.4)                    | 1,294 (92.6)              |                      | 133 (9.5)                                 | 1,265 (90.5)              |                      |
| Zidovudine                                                     |                                  |                              |                           |                      |                                           |                           |                      |
| Yes                                                            | 1,319 (94.2)                     | 99 (7.5)                     | 1,220 (92.5)              | 1.00                 | 127 (9.6)                                 | 1,192 (90.4)              | 1.00                 |
| No                                                             | 81 (5.8)                         | 6 (7.4)                      | 75 (92.6)                 |                      | 7 (8.6)                                   | 74 (91.4)                 |                      |
| <b>Nonnucleoside reverse transcriptase inhibitors (NNRTIs)</b> |                                  |                              |                           |                      |                                           |                           |                      |
| Efavirenz                                                      |                                  |                              |                           |                      |                                           |                           |                      |
| Yes                                                            | 91 (6.5)                         | 6 (6.6)                      | 85 (93.4)                 | 1.00                 | 9 (9.9)                                   | 82 (90.1)                 | 0.85                 |
| No                                                             | 1,309 (93.5)                     | 99 (7.6)                     | 1,210 (92.4)              |                      | 125 (9.5)                                 | 1,184 (90.5)              |                      |
| Nevirapine                                                     |                                  |                              |                           |                      |                                           |                           |                      |
| Yes                                                            | 503 (35.9)                       | 45 (8.9)                     | 458 (91.1)                | 0.12                 | 53 (10.5)                                 | 450 (89.5)                | 0.36                 |
| No                                                             | 897 (64.1)                       | 60 (6.7)                     | 837 (93.3)                |                      | 81 (9.0)                                  | 816 (91.0)                |                      |
| <b>Protease inhibitors (PIs)</b>                               |                                  |                              |                           |                      |                                           |                           |                      |
| Amprenavir                                                     |                                  |                              |                           |                      |                                           |                           |                      |
| Yes                                                            | 3 (0.2)                          | 0 (0.0)                      | 3 (100.0)                 | 1.00                 | 0 (0.0)                                   | 3 (100.0)                 | 1.00                 |
| No                                                             | 1,397 (99.8)                     | 105 (7.5)                    | 1,292 (92.5)              |                      | 134 (9.6)                                 | 1,263 (90.4)              |                      |
| Atazanavir                                                     |                                  |                              |                           |                      |                                           |                           |                      |
| Yes                                                            | 31 (2.2)                         | 2 (6.5)                      | 29 (93.5)                 | 1.00                 | 2 (6.5)                                   | 29 (93.5)                 | 0.76                 |
| No                                                             | 1,369 (97.8)                     | 103 (7.5)                    | 1,266 (92.5)              |                      | 132 (9.6)                                 | 1,237 (90.4)              |                      |
| Indinavir                                                      |                                  |                              |                           |                      |                                           |                           |                      |
| Yes                                                            | 13 (0.9)                         | 0 (0.0)                      | 13 (100.0)                | 0.62                 | 0 (0.0)                                   | 13 (100.0)                | 0.63                 |
| No                                                             | 1,387 (99.1)                     | 105 (7.6)                    | 1,282 (92.4)              |                      | 134 (9.7)                                 | 1,253 (90.3)              |                      |
| Fosamprenavir                                                  |                                  |                              |                           |                      |                                           |                           |                      |
| Yes                                                            | 2 (0.1)                          | 1 (50.0)                     | 1 (50.0)                  | 0.14                 | 1 (50.0)                                  | 1 (50.0)                  | 0.18                 |
| No                                                             | 1,398 (99.9)                     | 104 (7.4)                    | 1,294 (92.6)              |                      | 133 (9.5)                                 | 1,265 (90.5)              |                      |
| Lopinavir/ritonavir                                            |                                  |                              |                           |                      |                                           |                           |                      |
| Yes                                                            | 397 (28.4)                       | 33 (8.3)                     | 364 (91.7)                | 0.47                 | 45 (11.3)                                 | 352 (88.7)                | 0.16                 |
| No                                                             | 1,003 (71.6)                     | 72 (7.2)                     | 931 (92.8)                |                      | 89 (8.9)                                  | 914 (91.1)                |                      |

(continued)

SUPPLEMENTARY TABLE S1. (CONTINUED)

| <i>Individual ARV medication</i>           | <i>Overall<sup>a</sup> N (%)</i> | <i>Ever had microcephaly</i> |                           |                      | <i>Ever had any neurologic conditions</i> |                           |                      |
|--------------------------------------------|----------------------------------|------------------------------|---------------------------|----------------------|-------------------------------------------|---------------------------|----------------------|
|                                            |                                  | <i>Yes (%)<sup>b</sup></i>   | <i>No (%)<sup>b</sup></i> | <i>p<sup>c</sup></i> | <i>Yes (%)<sup>b</sup></i>                | <i>No (%)<sup>b</sup></i> | <i>p<sup>c</sup></i> |
| <b>Nelfinavir</b>                          |                                  |                              |                           |                      |                                           |                           |                      |
| Yes                                        | 568 (40.6)                       | 34 (6.0)                     | 534 (94.0)                | 0.08                 | 44 (7.8)                                  | 524 (92.3)                | 0.06                 |
| No                                         | 832 (59.4)                       | 71 (8.5)                     | 761 (91.5)                |                      | 90 (10.8)                                 | 742 (89.2)                |                      |
| <b>Ritonavir</b>                           |                                  |                              |                           |                      |                                           |                           |                      |
| Yes                                        | 2 (0.1)                          | 0 (0.0)                      | 2 (100.0)                 | 1.00                 | 0 (0.0)                                   | 2 (100.0)                 | 1.00                 |
| No                                         | 1,398 (99.9)                     | 105 (7.5)                    | 1,293 (92.5)              |                      | 134 (9.6)                                 | 1,264 (90.4)              |                      |
| <b>Saquinavir (hard and soft capsules)</b> |                                  |                              |                           |                      |                                           |                           |                      |
| Yes                                        | 16 (1.1)                         | 3 (18.8)                     | 13 (81.3)                 | 0.11                 | 3 (18.8)                                  | 13 (81.3)                 | 0.19                 |
| No                                         | 1,384 (98.9)                     | 102 (7.4)                    | 1,282 (92.6)              |                      | 131 (9.5)                                 | 1,253 (90.5)              |                      |
| <b>Fusion inhibitors</b>                   |                                  |                              |                           |                      |                                           |                           |                      |
| <b>Enfuvirtide</b>                         |                                  |                              |                           |                      |                                           |                           |                      |
| Yes                                        | 3 (0.2)                          | 0 (0.0)                      | 3 (100.0)                 | 1.00                 | 1 (33.3)                                  | 2 (66.7)                  | 0.26                 |
| No                                         | 1,397 (99.8)                     | 105 (7.5)                    | 1,292 (92.5)              |                      | 133 (9.5)                                 | 1,264 (90.5)              |                      |

<sup>a</sup>Column percentages are shown for overall use of individual ARVs.

<sup>b</sup>Row percentages are shown for comparing the proportion with the outcome between those exposed and not exposed to individual ARVs.

<sup>c</sup>p values for assessing the significance of the association of individual ARVs with the study outcomes are obtained using chi-square test or Fisher's exact test, where required, due to small cell size.

ARV, antiretroviral.
